# Supplementary material for: NanoCore: core-genome-based bacterial genomic surveillance and outbreak detection in healthcare facilities from Nanopore and Illumina data
Source: PubMed Central journal article supplement (PMC11575142; doi:10.1128/msystems.01080-24), 2024-10-07
Supplement: msystems.01080-24-s0003.pdf [file msystems.01080-24-s0003.pdf]

# Basic statistics (VRE, Nanopore-only)

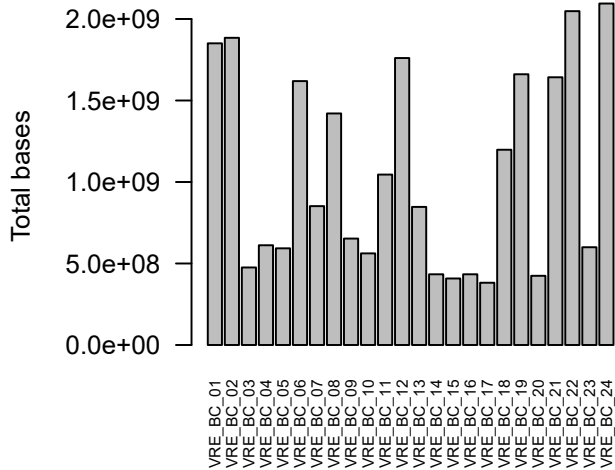

Samples

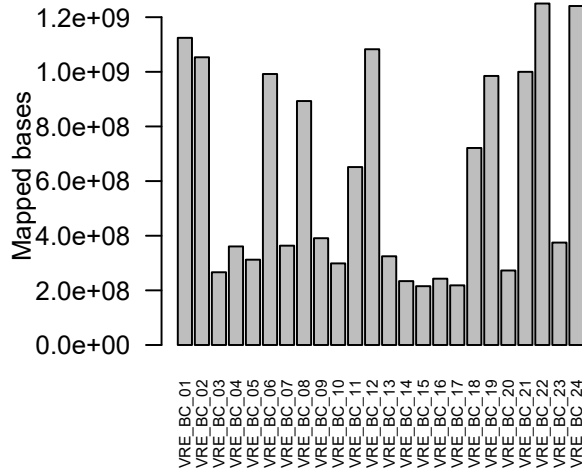

Samples

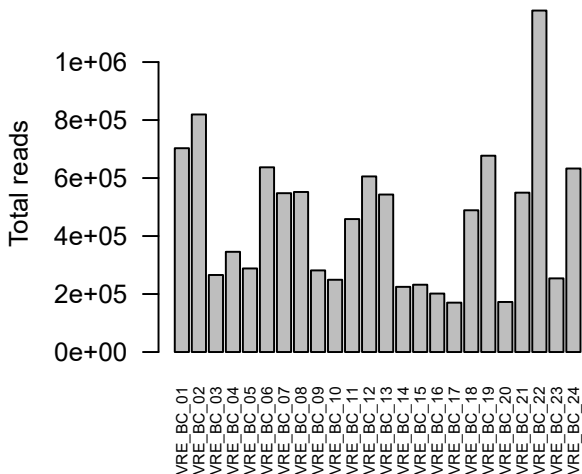

Samples

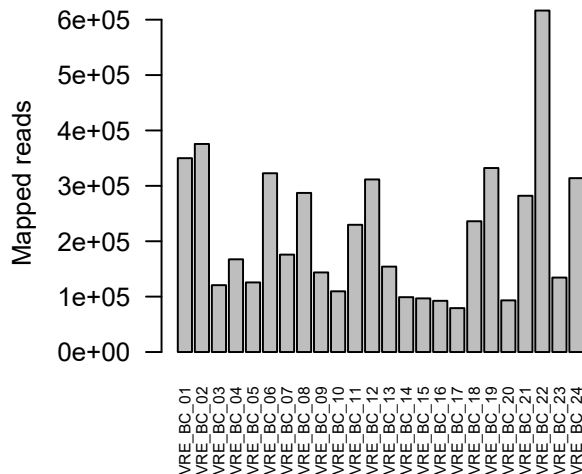

Samples

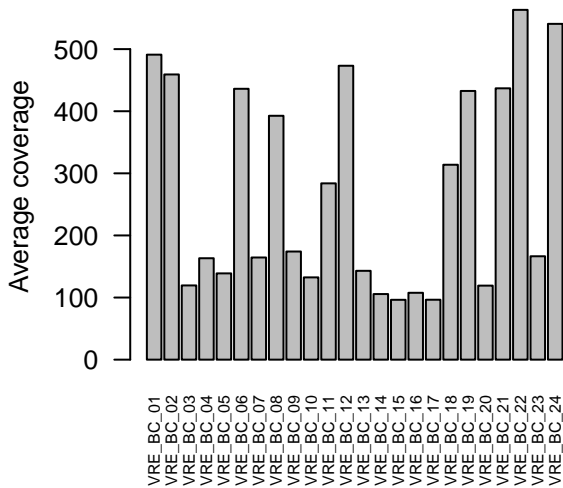

Samples

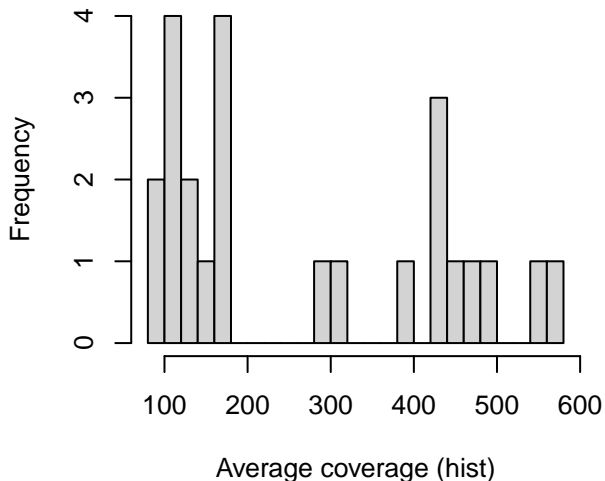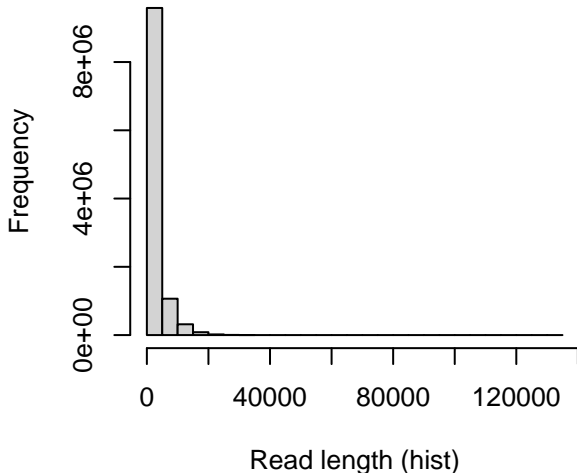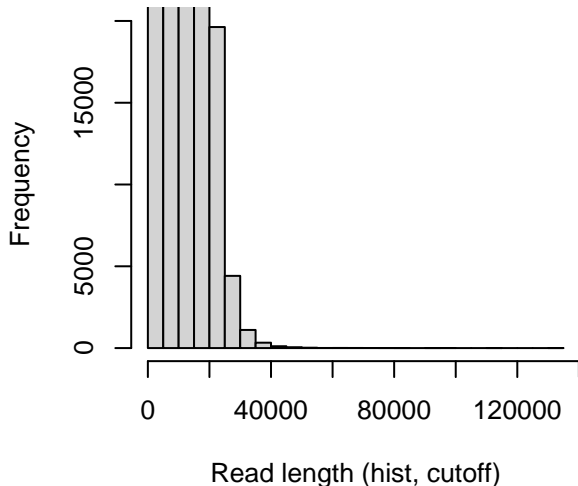

**Supplementary Figure 3:** Basic statistics of the Nanopore-only validation experiment 2 on VRE data. Shown are the number of total bases, the number of mapped bases, the number of total reads, the number of mapped reads and the average coverage, each per sample, as well as frequency histograms of the average coverage and the read length.
