# Supplementary material for: NanoCore: core-genome-based bacterial genomic surveillance and outbreak detection in healthcare facilities from Nanopore and Illumina data
Source: PubMed Central journal article supplement (PMC11575142; doi:10.1128/msystems.01080-24), 2024-10-07
Supplement: msystems.01080-24-s0005.pdf [file msystems.01080-24-s0005.pdf]

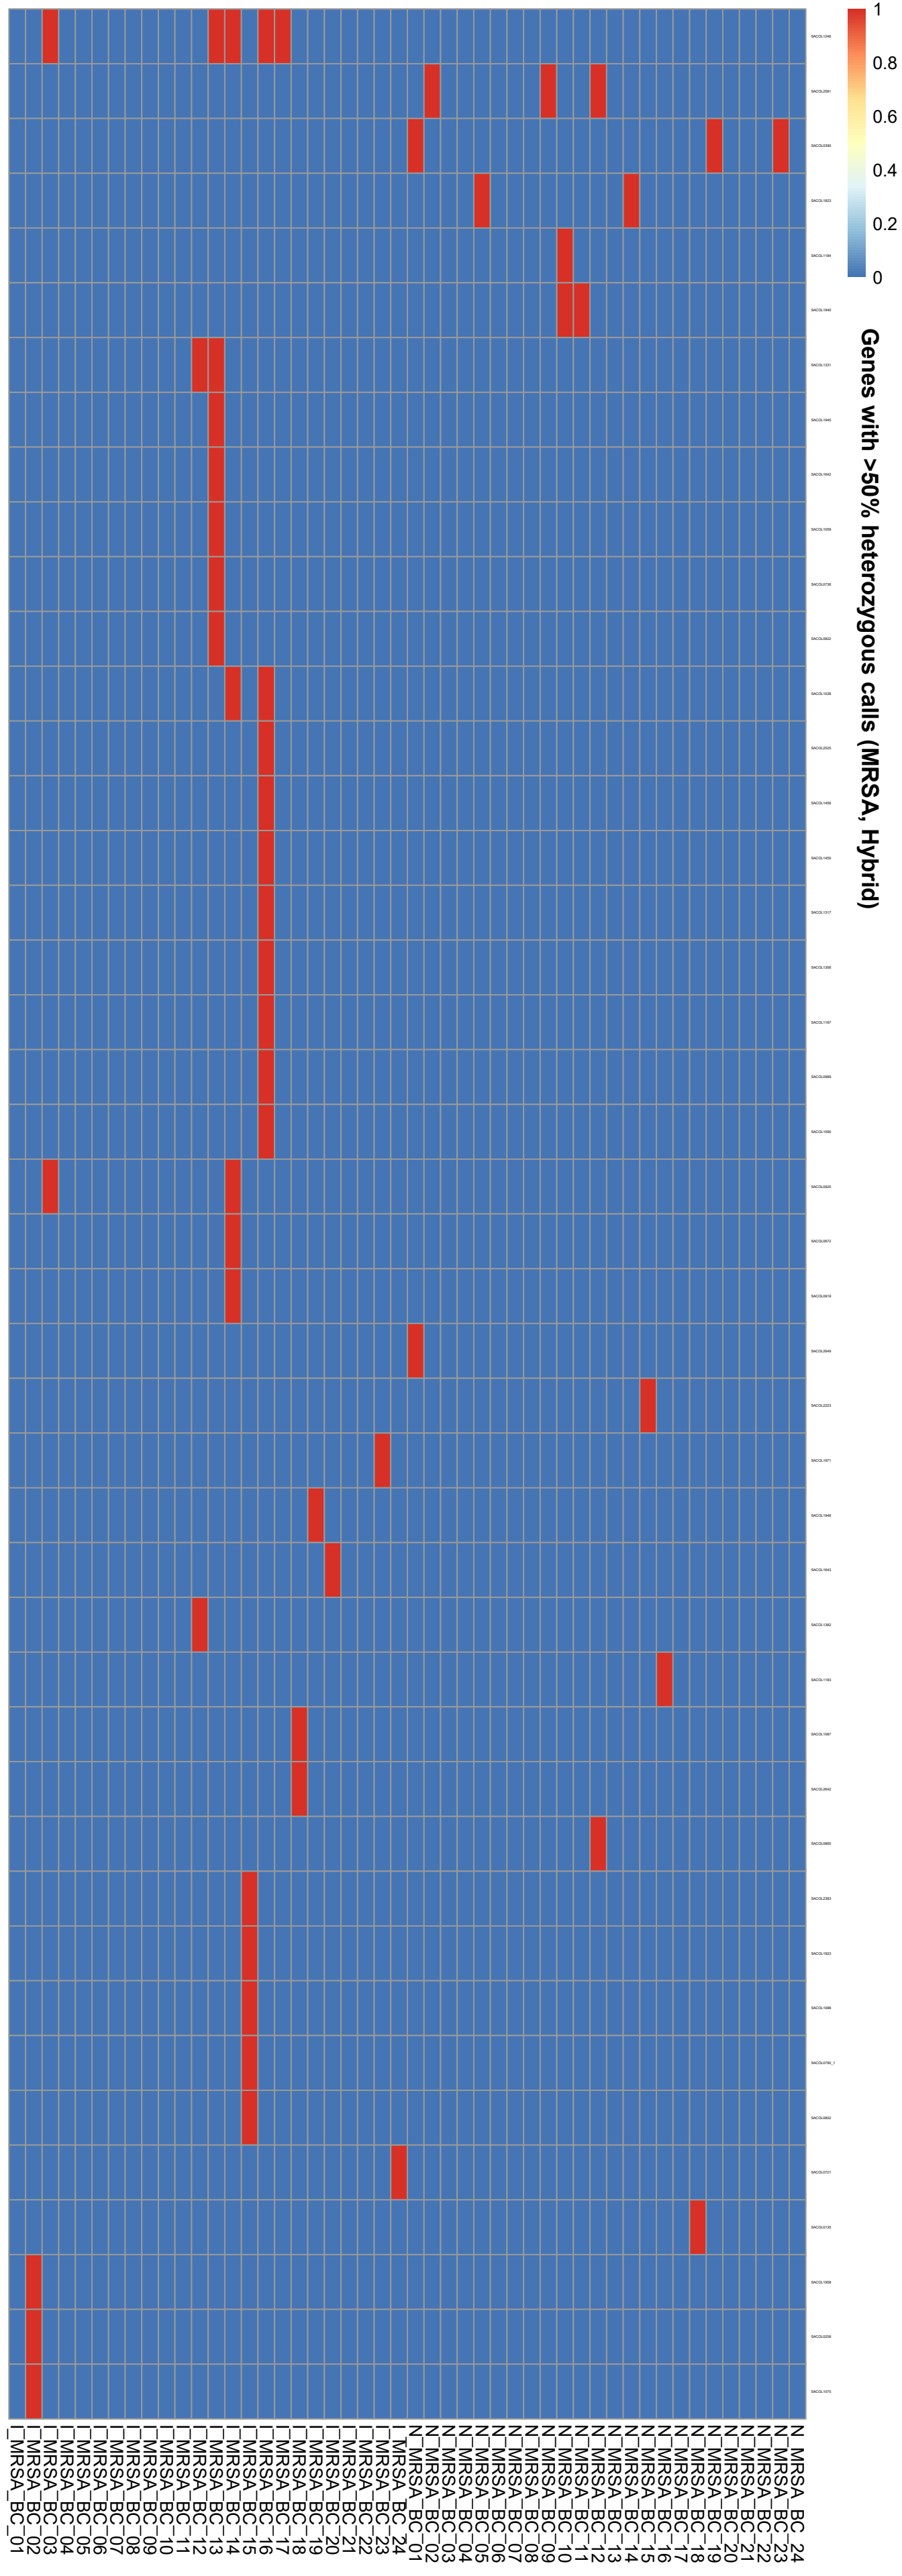

Genes with mapQ <55 (MRSA, Hybrid)

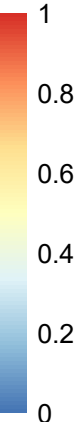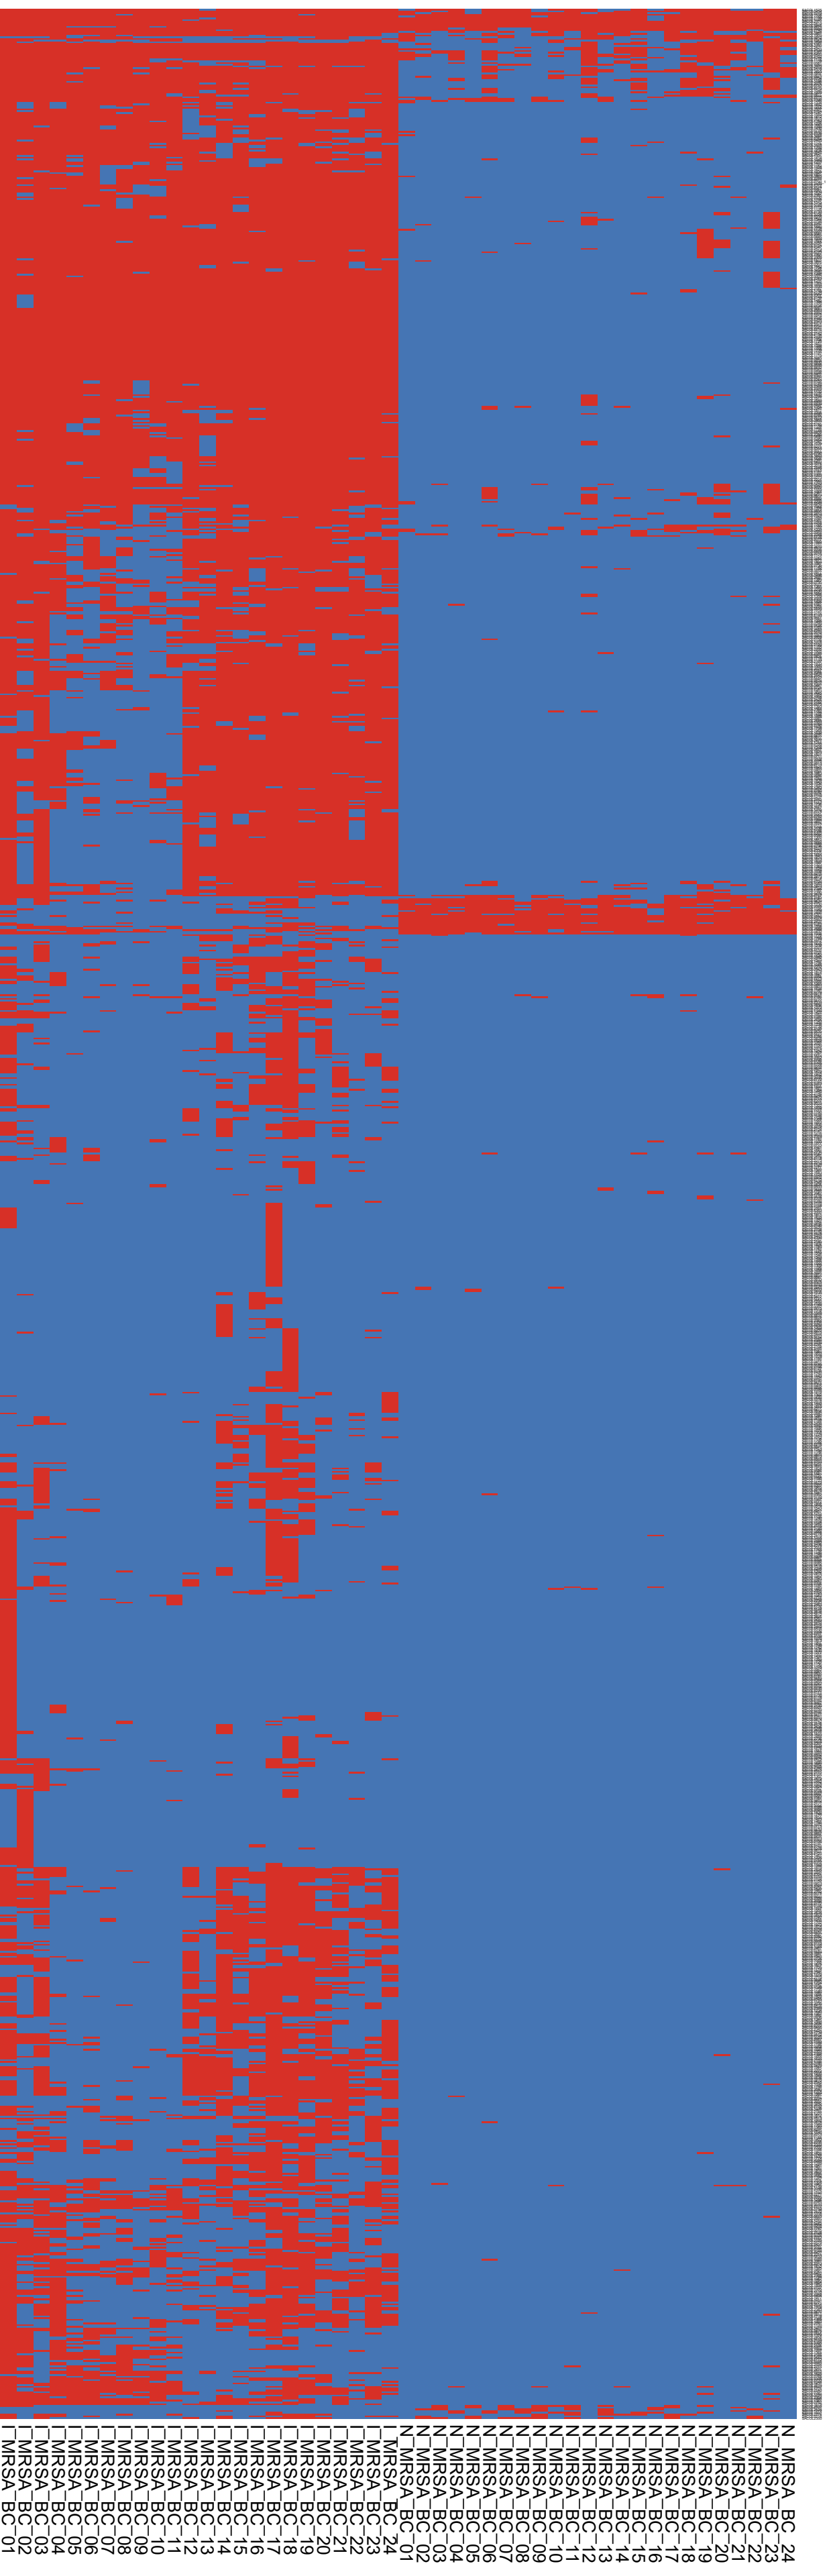

Genes with coverage that differs  $\pm 25\%$  from the mean (MRSA, Hybrid)

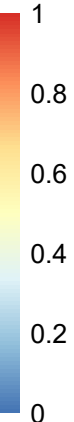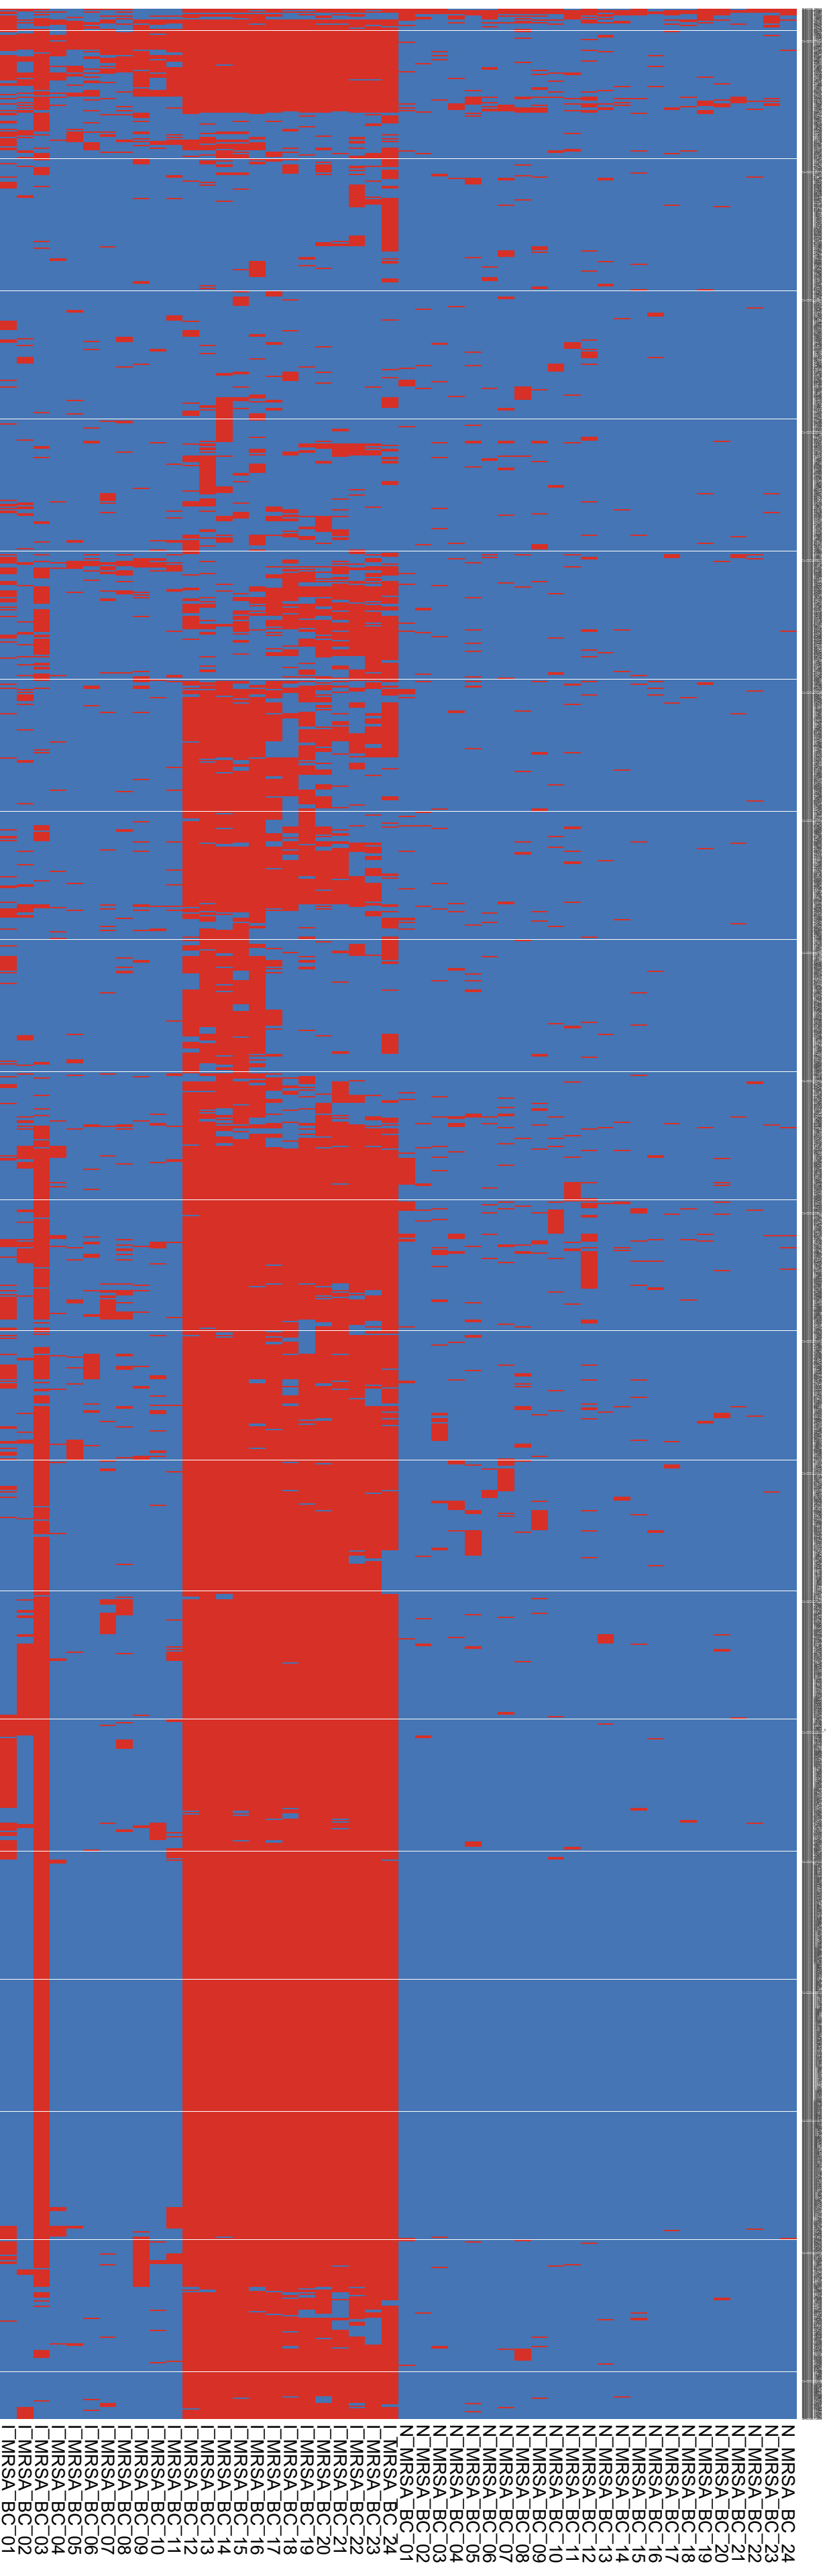

**Supplementary Figure 5:** Heatmaps of eye-catching and potentially due to different filters excluded genes in the hybrid validation experiment 3 part 1 on MRSA data. Shown are genes with more than 50% of heterozygous variant-calls, genes with below 55 mapping quality and genes with a coverage that differs more than 25% from the mean.
