# Supplementary material for: NanoCore: core-genome-based bacterial genomic surveillance and outbreak detection in healthcare facilities from Nanopore and Illumina data
Source: PubMed Central journal article supplement (PMC11575142; doi:10.1128/msystems.01080-24), 2024-10-07
Supplement: msystems.01080-24-s0006.pdf [file msystems.01080-24-s0006.pdf]

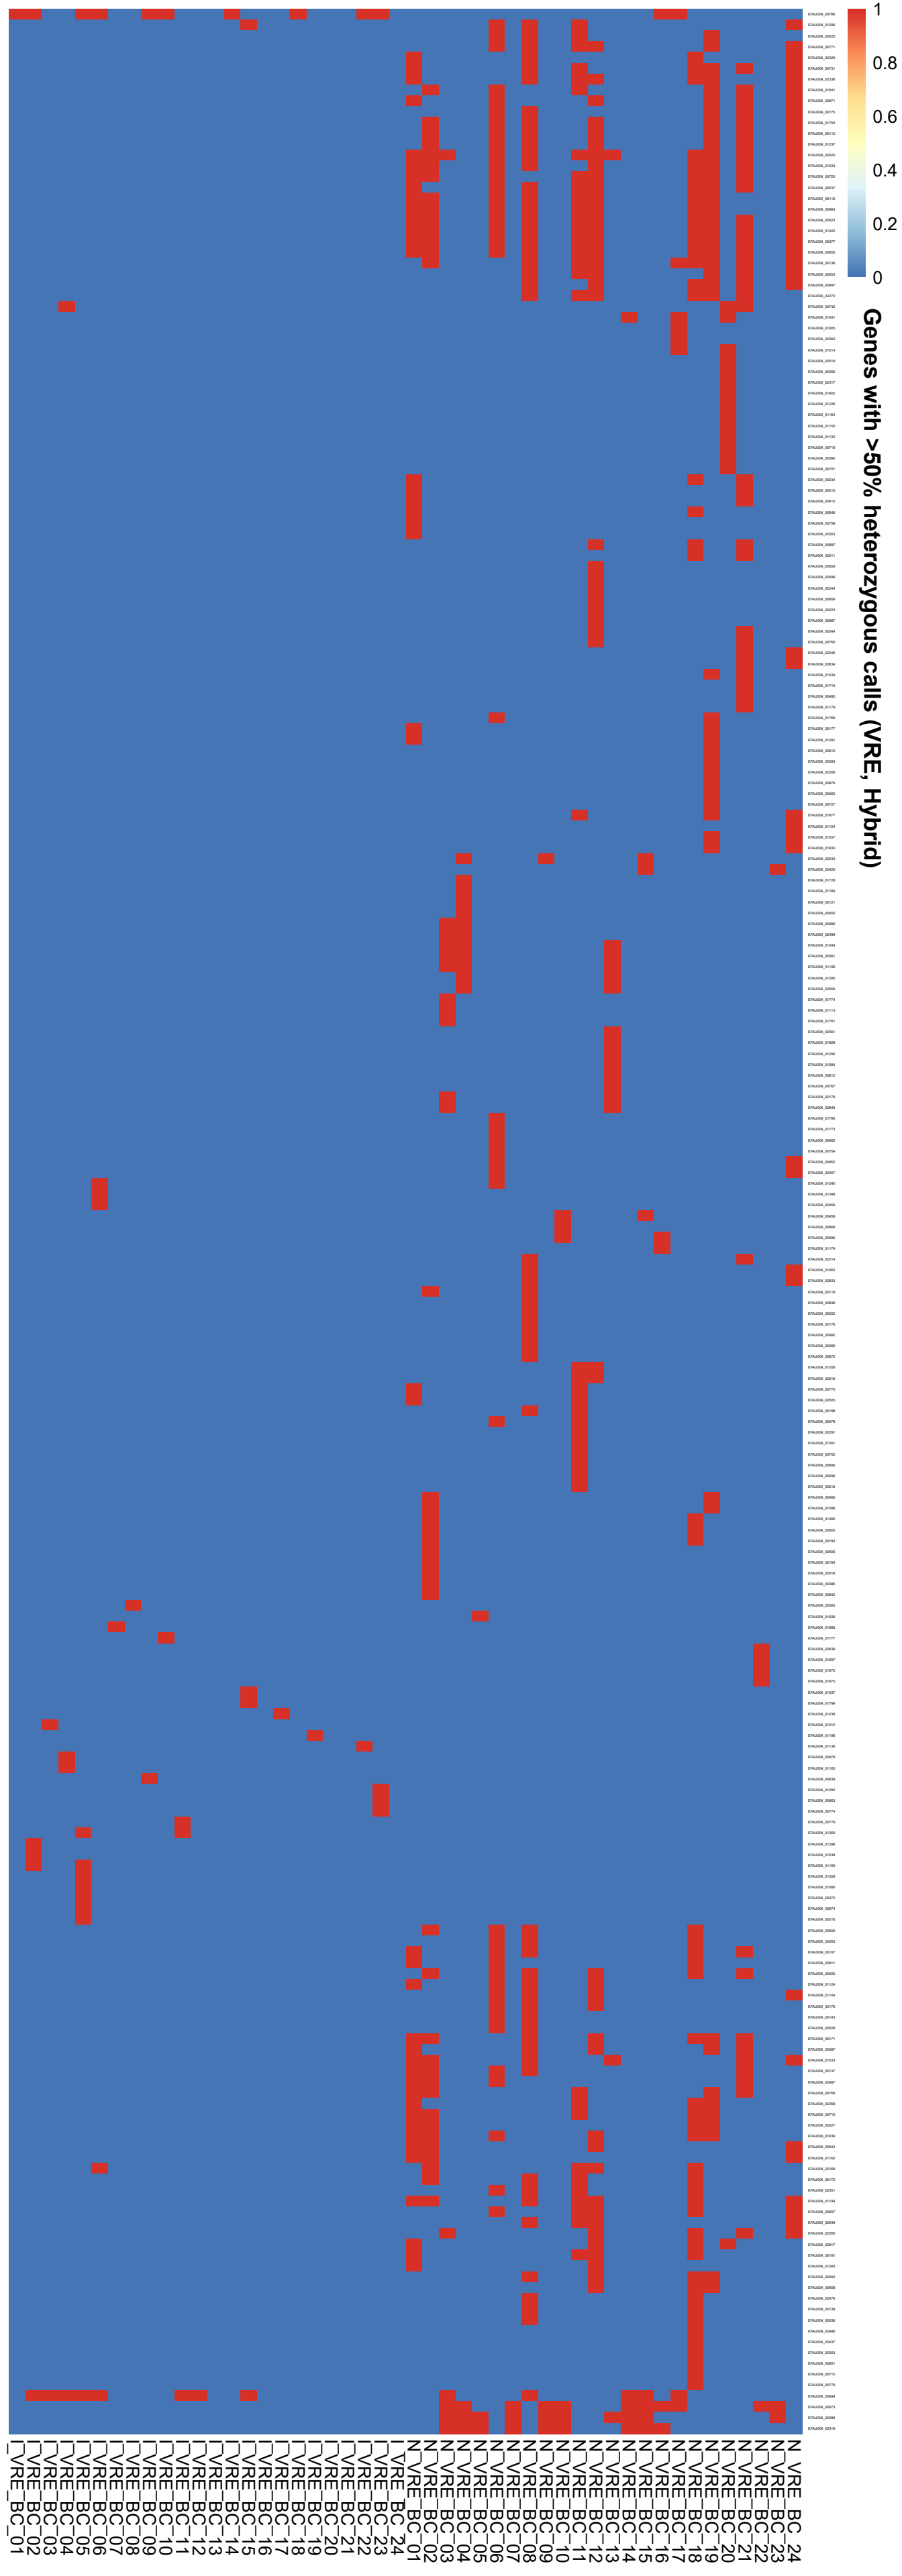

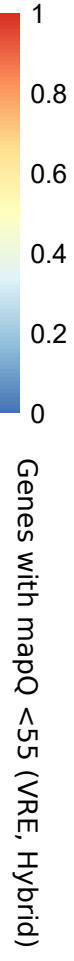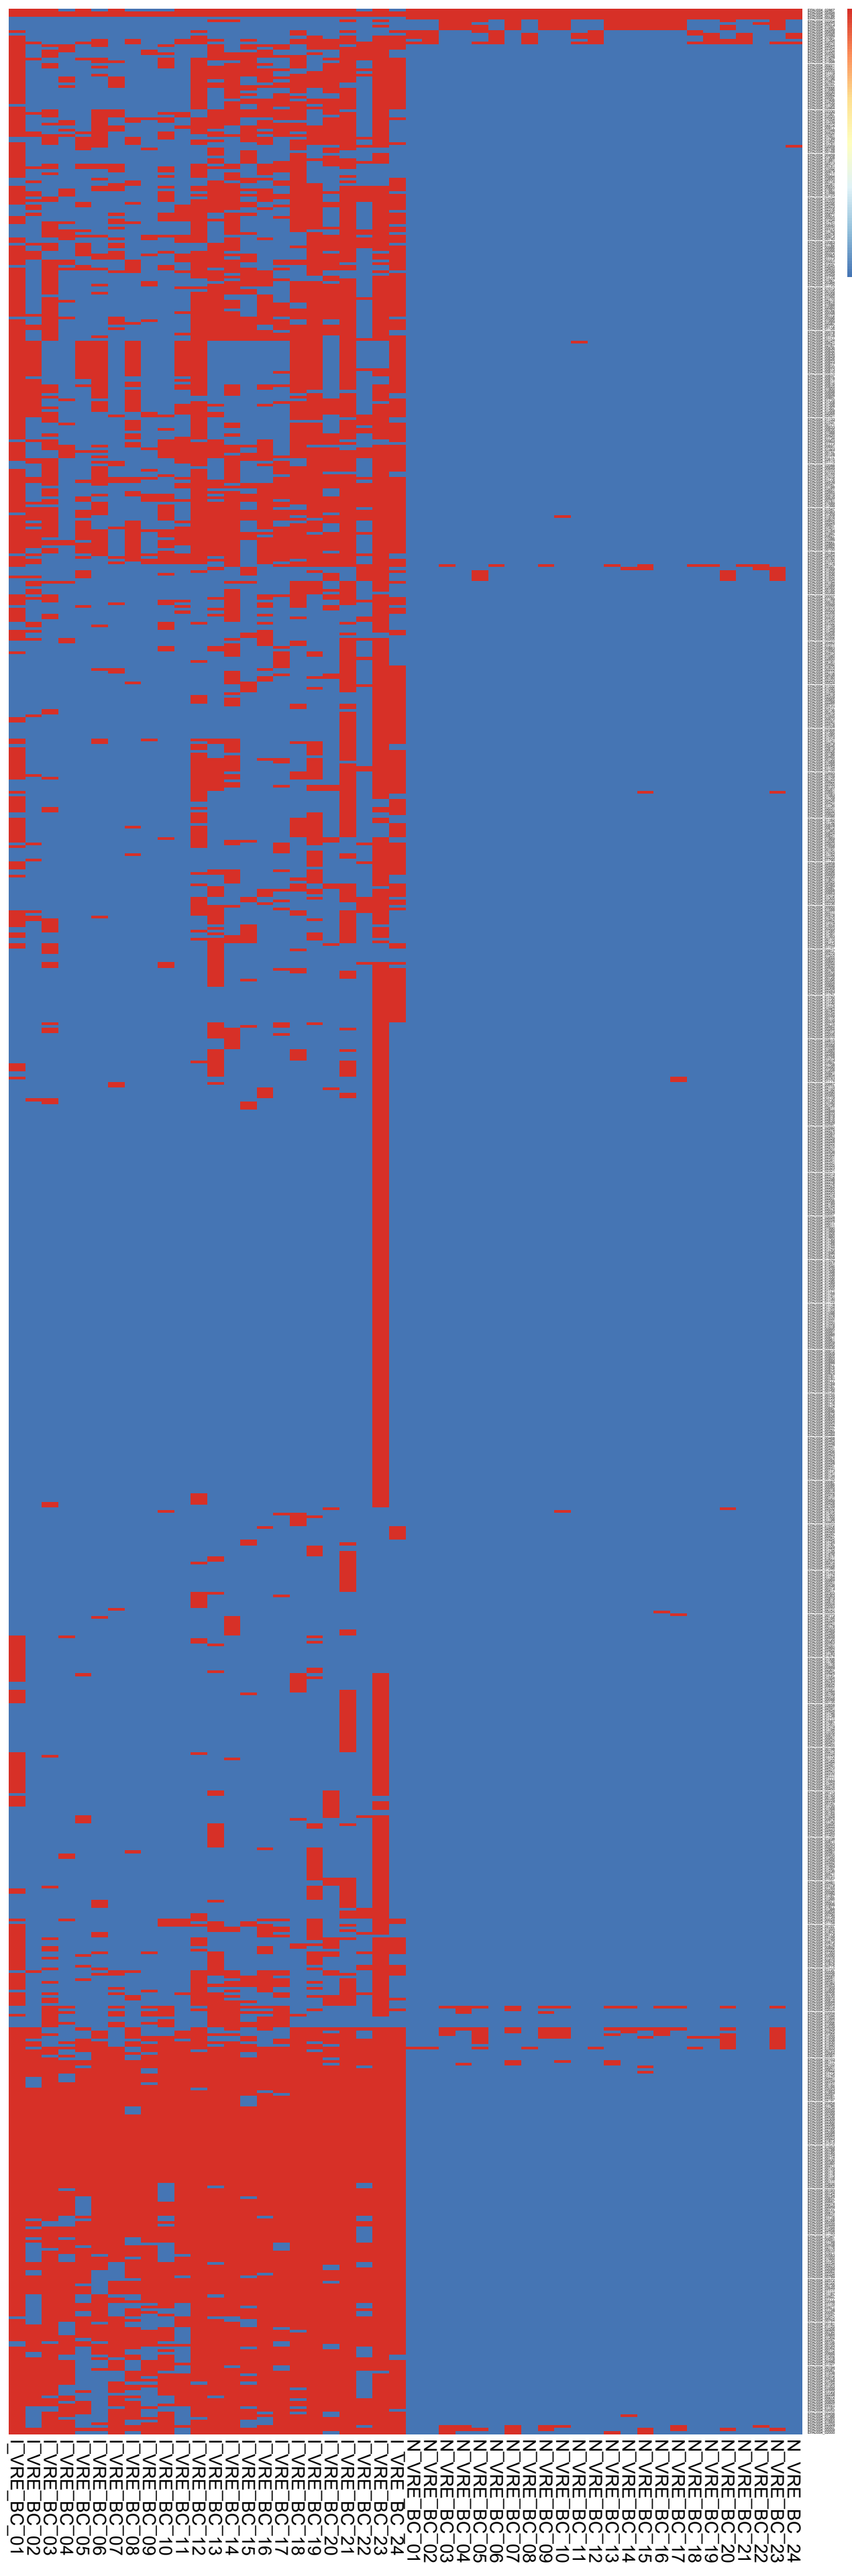

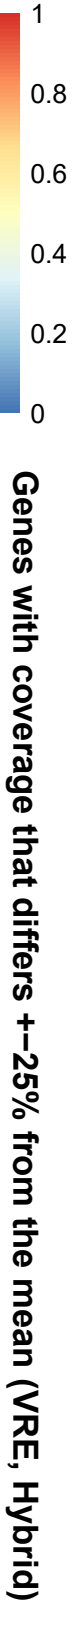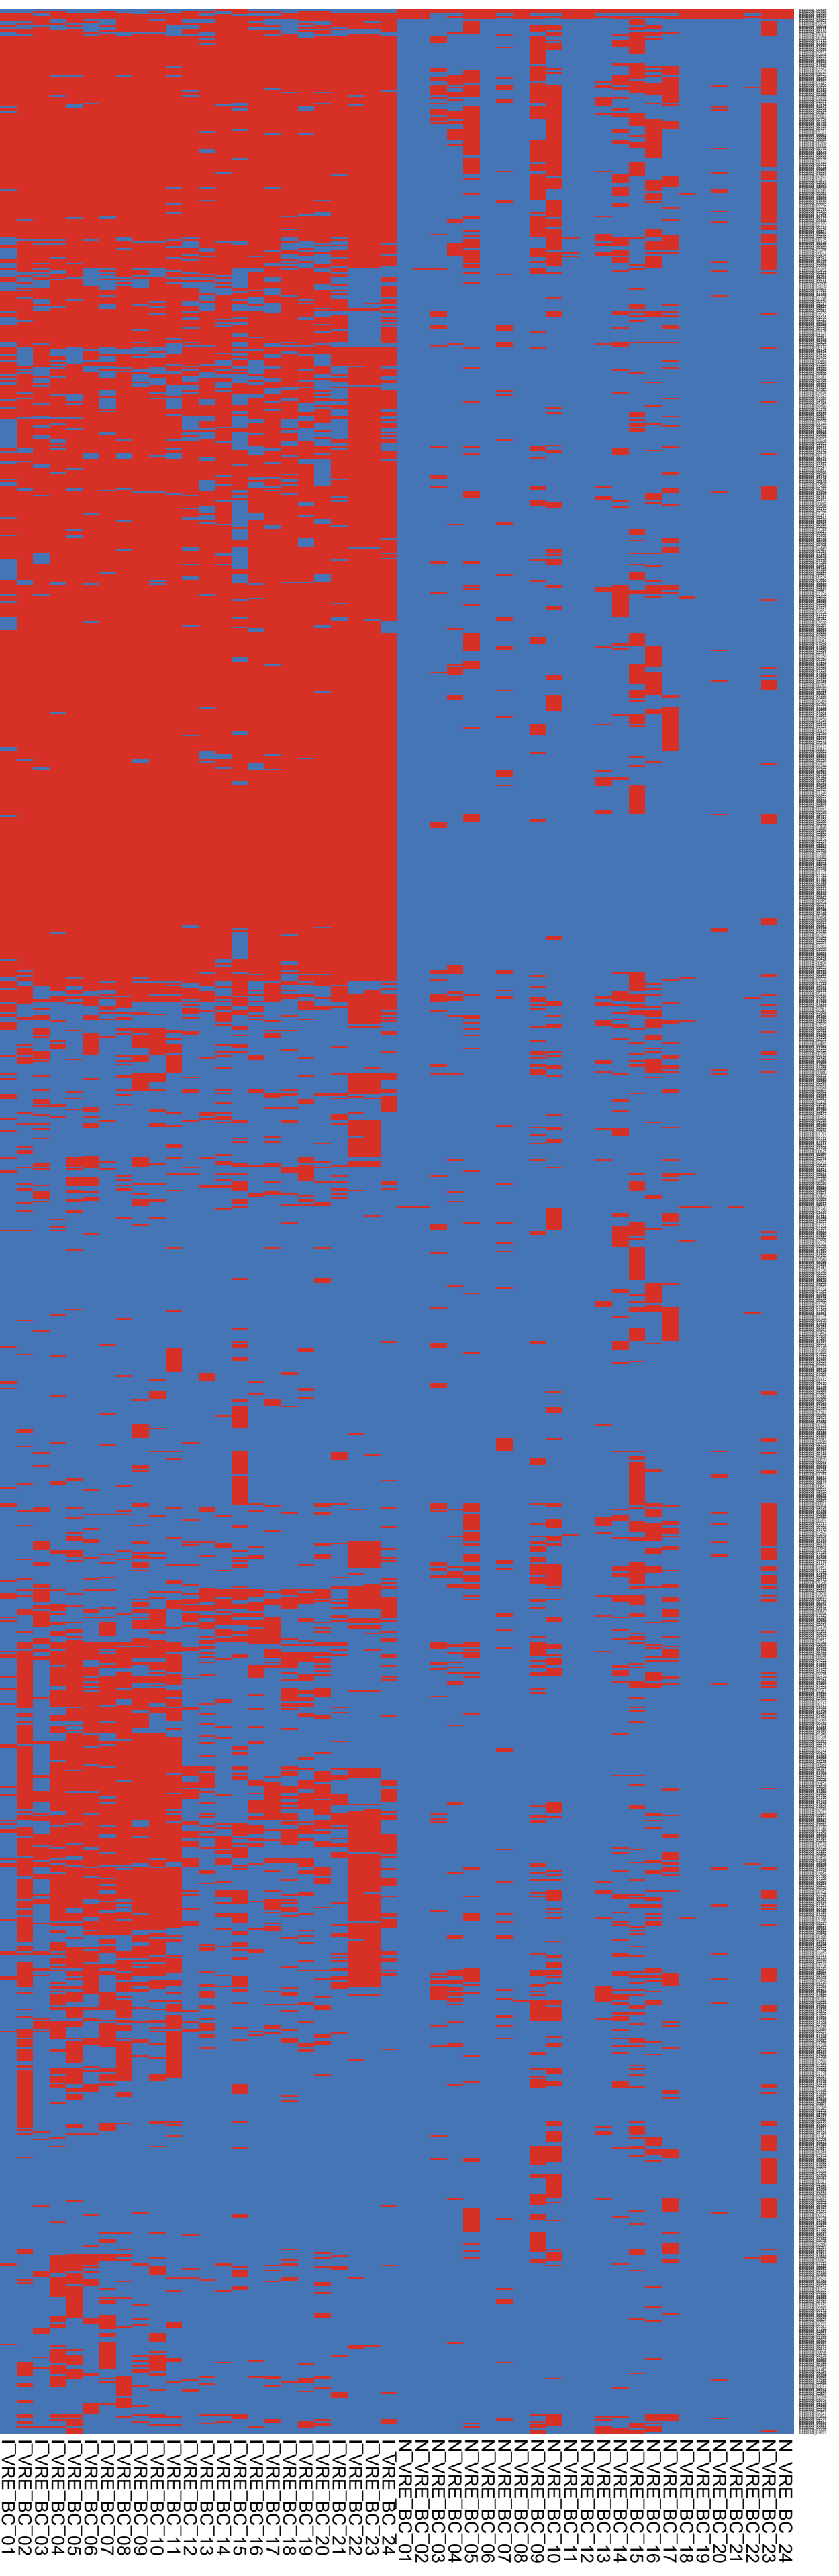

N\_VRE\_BC\_24  
 N\_VRE\_BC\_23  
 N\_VRE\_BC\_22  
 N\_VRE\_BC\_21  
 N\_VRE\_BC\_20  
 N\_VRE\_BC\_19  
 N\_VRE\_BC\_18  
 N\_VRE\_BC\_17  
 N\_VRE\_BC\_16  
 N\_VRE\_BC\_15  
 N\_VRE\_BC\_14  
 N\_VRE\_BC\_13  
 N\_VRE\_BC\_12  
 N\_VRE\_BC\_11  
 N\_VRE\_BC\_10  
 N\_VRE\_BC\_09  
 N\_VRE\_BC\_08  
 N\_VRE\_BC\_07  
 N\_VRE\_BC\_06  
 N\_VRE\_BC\_05  
 N\_VRE\_BC\_04  
 N\_VRE\_BC\_03  
 N\_VRE\_BC\_02  
 N\_VRE\_BC\_01  
 VRE\_BC\_24  
 VRE\_BC\_23  
 VRE\_BC\_22  
 VRE\_BC\_21  
 VRE\_BC\_20  
 VRE\_BC\_19  
 VRE\_BC\_18  
 VRE\_BC\_17  
 VRE\_BC\_16  
 VRE\_BC\_15  
 VRE\_BC\_14  
 VRE\_BC\_13  
 VRE\_BC\_12  
 VRE\_BC\_11  
 VRE\_BC\_10  
 VRE\_BC\_09  
 VRE\_BC\_08  
 VRE\_BC\_07  
 VRE\_BC\_06  
 VRE\_BC\_05  
 VRE\_BC\_04  
 VRE\_BC\_03  
 VRE\_BC\_02  
 VRE\_BC\_01

**Supplementary Figure 6:** Heatmaps of eye-catching and potentially due to different filters excluded genes in the hybrid validation experiment 3 part 1 on VRE data. Shown are genes with more than 50% of heterozygous variant-calls, genes with below 55 mapping quality and genes with a coverage that differs more than 25% from the mean.
