# Supplementary material for: NanoCore: core-genome-based bacterial genomic surveillance and outbreak detection in healthcare facilities from Nanopore and Illumina data
Source: PubMed Central journal article supplement (PMC11575142; doi:10.1128/msystems.01080-24), 2024-10-07
Supplement: msystems.01080-24-s0007.pdf [file msystems.01080-24-s0007.pdf]

# IGV screenshots of possible gene duplication

A

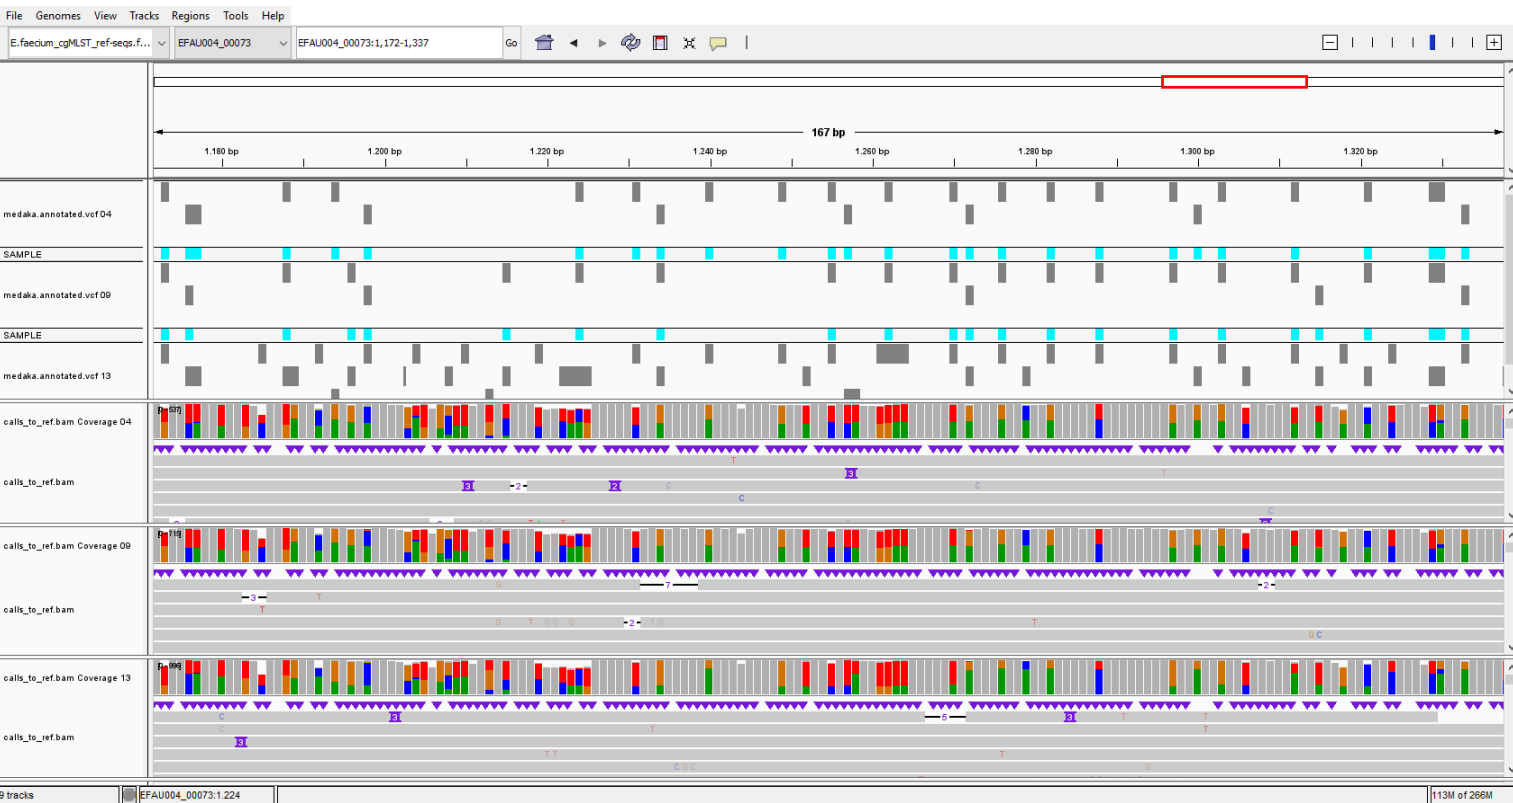

B

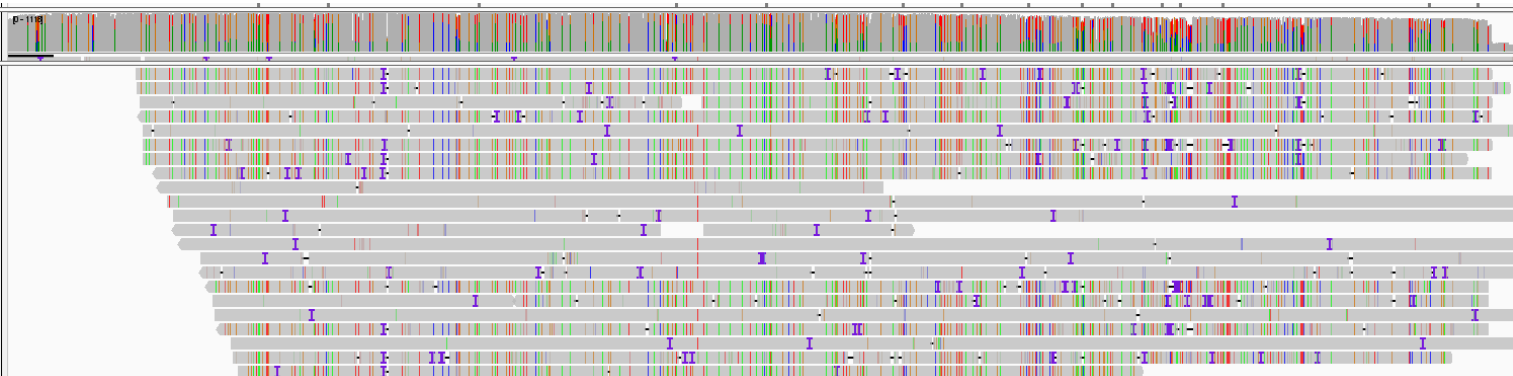

**Supplementary Figure 7:** Integrative Genomics Viewer screenshot of a genomic area that shows read with variant patterns of a possible gene duplication. Shown are A) a zoomed-in position of gene EFAU004\_00073 that shows that most of the found variants indicate two different bases with around 50% ratio each and B) the full length of gene EFAU004\_00073 that show, that all reads exhibit one of two possible variant patterns.
